# Supplementary material for: Optimization of a SnO2-based electron transport layer using cerium oxide for efficient and stable perovskite solar cells
Source: Royal Society of Chemistry journal article supplement (doi:10.1039/d5se00296f), 2025-01-01
Supplement: d5se00296f1.pdf [file d5se00296f1.pdf]

## SUPPRTING INFORMATION

### **Optimization of SnO<sub>2</sub>-Based Electron Transport Layer Using Cerium Oxide for Efficient and Stable Perovskite Solar Cells**

Zhipeng Liu<sup>1</sup>, Zhiwei Gu<sup>1</sup>, Yang Lv<sup>1</sup>, Zhiqin Su<sup>1</sup>, Jian Sun<sup>1</sup>, Linlin Qiu<sup>3, \*</sup>, Pingfan Du<sup>1, 2,</sup>  
\*

<sup>1</sup> *College of Textile Science and Engineering, Zhejiang Sci-Tech University, Hangzhou  
310018, PR China*

<sup>2</sup> *Key Laboratory of Intelligent Textile and Flexible Interconnection of Zhejiang Province,  
Zhejiang Sci-Tech University, Hangzhou 310018, PR China*

<sup>3</sup> *College of Textile and Apparel, Quanzhou Normal University, Quanzhou 362000, China*

\*Corresponding author. Tel.: fax: +86 571 86843603

E-mail addresses: dupf@zstu.edu.cn (P. Du); qiull@qztc.edu.cn (L. Qiu)

## Experimental Section

**Materials:** Cerium (III) acetylacetonate hydrate and ethanol were provided by Shanghai Macklin Biochemical Co., Ltd. The ITO glass substrates were fabricated by Advanced Election Technology Co., Ltd. Lead (II) iodide ( $\text{PbI}_2$ , 99.99%), formamidinium iodide (FAI, 99.5%), methylammonium bromide (MABr, 99.5%), cesium iodide (CsI, 99.99%), Tris[4-(1, 1-dimethylethyl)-2-(1H-pyrazol-1-yl)pyridine]cobaltsalt with 1, 1, 1-trifluoro-N-[(trifluoromethyl)sulfonyl]methanesulfonamide (FK209 Co(III) TFSI, 98%), lithium bis(trifluoromethanesulfonyl)imide (Li-TFSI, 99.95%), 4-tert-butylpyridine (t-BP, 96%), 2, 2', 7, 7'-Tetrakis(*N*, *N*-di-*p*-methoxyphenylamine)-9, 9'-spirobifluorene (spiro-OMeTAD, 99.5%) and phenyl-C61-butyric acid methyl ester ( $\text{PC}_{61}\text{BM}$ , 99%) were purchased from Xi'an Polymer Light Technology Corp.  $\text{SnO}_2$  colloidal solution (15% in water) was purchased from Alfa Aesar. Dimethyl formamide (DMF, 99.8%, anhydrous), dimethyl sulfoxide (DMSO, 99.9%, anhydrous), isopropanol (IPA, 99.7%), chlorobenzene (CB, 99.8%, anhydrous), and acetonitrile (ACN, 99.8%, anhydrous) was supplied by Aladdin. All chemicals were used as received without further purification.

**$\text{SnO}_2/\text{CeO}_x$  ETLs fabrication:** the colloidal  $\text{SnO}_2$  aqueous dispersion solution was diluted using deionized water to 2.14 wt% to obtain  $\text{SnO}_2$  precursor. Then Cerium (III) acetylacetonate hydrate was added to ethanol at a solution concentration of 2 mg/ml and then treated in an ultrasonic bath for 30 min to obtain a  $\text{CeO}_x$  precursor solution. These precursors were then spin-coated onto pre-cleaned ITO glasses at a rate of 4000 rpm for 30s, followed by thermal annealing at 150 °C for 30 min in ambient air, to fabricate  $\text{SnO}_2$

1 and SnO<sub>2</sub>/ CeO<sub>x</sub> ETLs.

2 **Perovskite precursor solution:** The perovskite precursor was prepared with PbI<sub>2</sub> (742.2  
3 mg), FAI (224.4 mg), MABr (16.2 mg), and CsI (19.8 mg) are dissolved into anhydrous  
4 DMF/DMSO (v/v: 8:2) mixed solution and stirred at room temperature for 5 h.

5 **Device fabrication:** Firstly, the (indium tin oxide) ITO glass substrates were  
6 sequentially cleaned with detergent adding into deionized water, acetone, and ethanol for  
7 15 min each in an ultrasonic bath. The glass substrates were cleaned with IPA at 5000 rpm  
8 for 15 s, and then dried at 60 °C for 10 min. Before depositing the ETL films and the  
9 perovskite films, all the substrates were further treated with UV-ozone for 15 min. The  
10 perovskite films were deposited onto the ETL substrates via a two-step spin-coating at  
11 1000 r/10 s and 5000 r/30 s. After the perovskite precursor were dropped, the antisolvent  
12 EA were rapidly dropped on the center of substrate 15 s prior to the end of the program,  
13 the as-prepared perovskite films were annealed at 150 °C for 30 min. Upon cooling to room  
14 temperature, The HTL precursor solution was prepared by mixing 70 mg of Spiro-  
15 OMeTAD power, 20 µL of t-BP, and 70 µL of Li-TFSI solution (170 mg Li-TSFI dissolve  
16 in 1 mL ACN) and 50 µL of FK209 Co (III) TFSI Salt (150 mg/mL in ACN) in 1 mL of  
17 CB, was spin-coated on the top of the perovskite films at 4000 rpm for 30 s. Finally, an Ag  
18 electrode with a thickness of 80 nm with an active area of 0.06 cm<sup>2</sup> was deposited by  
19 thermal evaporation. All devices were assembled in ambient air with a relative humidity of  
20 25-35% and a temperature of 18-23 °C.

21 **Characterization:** Top-view and cross-sectional scanning electron microscopy (SEM)

1 images were characterized through a Field-emission scanning electron microscope (FE-  
2 SEM, Ultra 55, Zeiss, Germany) with an electron beam accelerated voltage at 3 kV. The  
3 CeO<sub>x</sub> nanoparticles were observed by transmission electron microscopy (TEM, JEOLJEM  
4 2100) at 200 kV. Wide-angle XRD measurements were implemented with a Bruker D8  
5 Advance instrument using a Cu K $\alpha$  source (40 kV, 1.54 Å) with an incidence angle of 1.0°.  
6 X-ray photoelectron spectroscopy (XPS, K-Alpha, USA) is performed using a micro-focus  
7 monochromatic Al K $\alpha$  X-ray source, corresponded to the instrument resolution of 0.45 eV.  
8 UPS was carried out by using an ultraviolet photoelectron spectrometer (ESCALAB  
9 250Xi, Thermo Fisher). The UV-visible absorption and transmission spectra were recorded  
10 by a UV-Visible spectrophotometer (UV-vis, P4, China). The electrochemical impedance  
11 spectroscopy (EIS) is measured by a potentiostat (Im6ex/Zahner) to explore charge transfer  
12 properties and battery performance with an alternative signal amplitude of 10 mV and a  
13 frequency range of 0.01-100 kHz. The steady-state photoluminescence (PL) spectrum PL  
14 and Time-resolved PL (TRPL) decay were measured via Fluo Time 300 fluorophotometer  
15 Lifetime Spectrometer. Incident photo-to-current conversion efficiency (IPCE) curves are  
16 recorded using a quantum efficiency (QE)/IPCE measured system (Solar Cell Scan  
17 100/Zolix) and calibrated by a monocrystalline silicon diode. The  $J$ - $V$  characteristics of  
18 PSCs were measured with a source meter (2400-SCS, Keithley) under AM1.5 radiation (1  
19 sun conditions, 100 mW cm<sup>-2</sup>).

20 **Equation S1.** Gaussian function for peak analysis and peak fitting:

$$y = y_0 + \frac{Ae^{-4\ln(2)(x-x_c)^2}}{w\sqrt{\frac{\pi}{4\ln(2)}}} \quad (\text{S1})$$

$y_0$  represents the ordinate position of the baseline,  $A$  is constant,  $x_c$  is the abscissa corresponding to the highest intensity of the diffraction peak, and  $w$  represents the half-peak width value (FWHM).

**Equation S2.** The Debye-Scherrer formula:

$$D = \frac{k\lambda}{w\cos\theta} \quad (\text{S2})$$

$D$  represents the grain size,  $k$  is constant,  $\lambda$  is the incidence wavelength of X-rays,  $\theta$  is the diffraction angle, and  $w$  represents the FWHM value.

**Equation S4.** The PL decay curves were fitted using the following bi-exponential decay function:

$$Y = A_1\exp\left(-\frac{t}{\tau_1}\right) + A_2\exp\left(-\frac{t}{\tau_2}\right) + y_0, \quad (\text{S3})$$

where  $A_1$  and  $A_2$  are constants representing the contributions of the fast and slow components, respectively. The fast transient component,  $\tau_1$ , is linked to the surface characteristics, while the slow transient component,  $\tau_2$ , is linked to the volume characteristics.  $y_0$  is an offset constant.

**Equation S5.** The average TRPL lifetime was calculated according to:

$$\tau_{ave} = \frac{A_1 * \tau_1^2 + A_2 * \tau_2^2}{A_1 * \tau_1 + A_2 * \tau_2}. \quad (\text{S4})$$

**Equation S6.** The open-circuit voltage dependence on light intensity was fitted using

1 the following equation:

$$2 \quad V_{oc} = \frac{nkT}{q} \ln(I) \quad (S5)$$

3 where  $n$  is the ideality factor,  $k$  is the Boltzmann constant,  $T$  is the absolute temperature,  
4  $q$  is the elementary charge, and  $I$  is the light intensity.

5 **Equation S7.** The trap density was calculated using the following equation:

$$6 \quad N_{defects} = \frac{2\varepsilon_0\varepsilon V_{TFL}}{eL^2} \quad (S6)$$

7 where  $\varepsilon_0$  is the vacuum permittivity,  $\varepsilon$  is the relative dielectric constant of the perovskite,  
8  $e$  is the electron charge, and  $L$  is the thickness of the perovskite layer.

9 **Equation S8.** The hysteresis index of the PSCs was calculated according to the  
10 following equation:

$$11 \quad Hysteresis\ index = \frac{PCE_{Reverse} - PCE_{Forward}}{PCE_{Reverse}} \times 100\% \quad (S7)$$

12

13

14

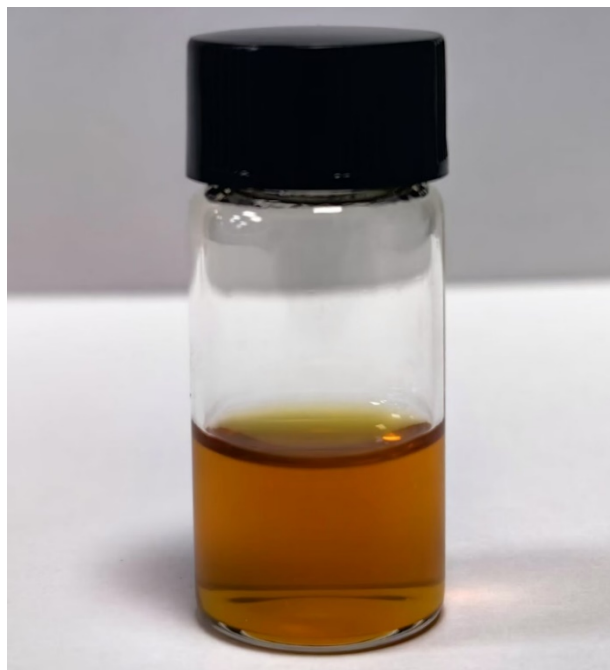

**Figure S1.** Optical image of  $\text{CeO}_x$  precursor solution.

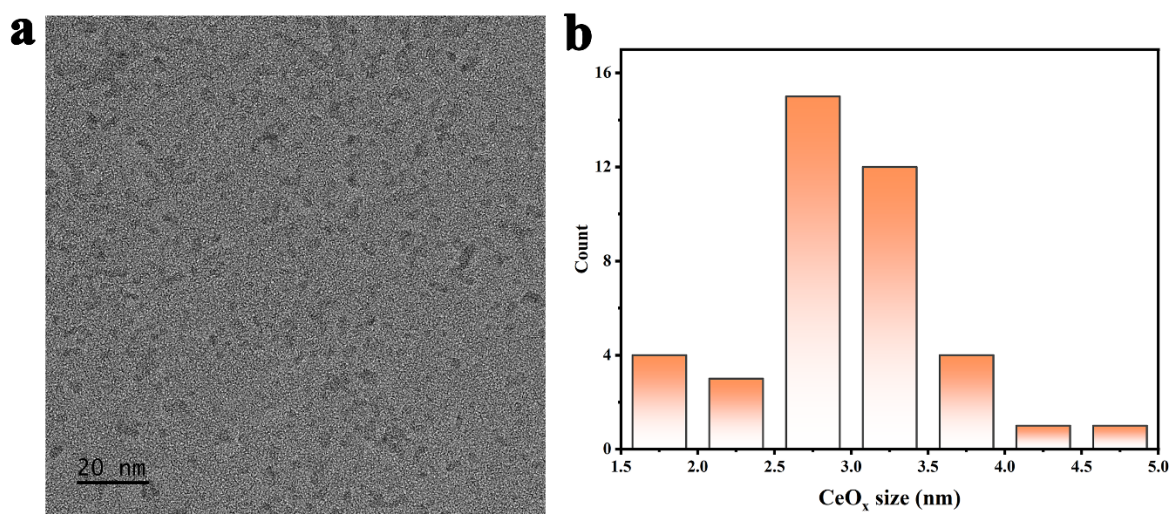

**Figure S2.** (a) TEM image and (b) size distribution of  $\text{CeO}_x$ .

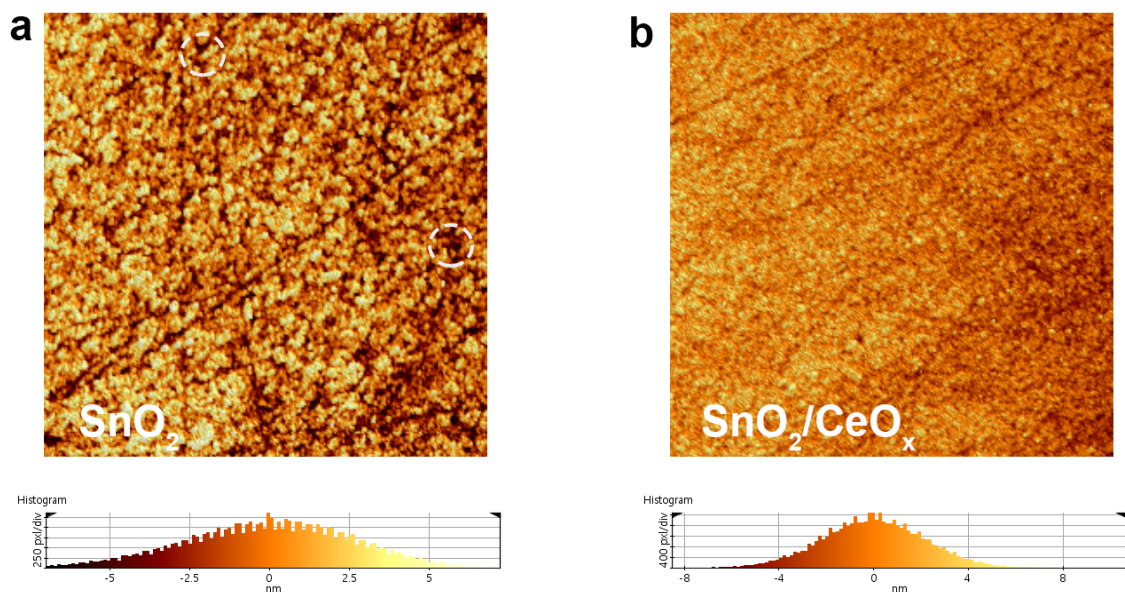

**Figure S3.** The top view AFM images and normal distribution chart of (a)  $\text{SnO}_2$  and (b)  $\text{SnO}_2/\text{CeO}_x$  films.

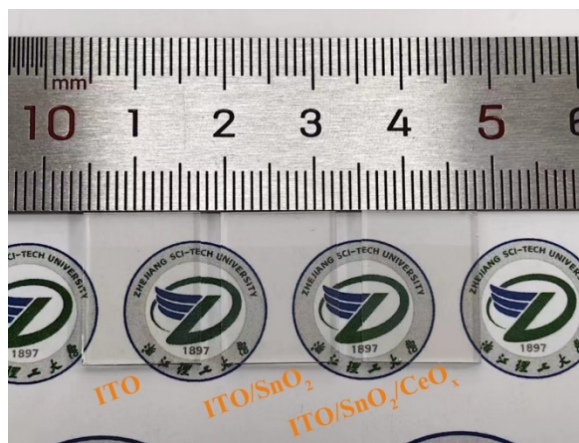

**Figure S4.** Optical image of the pristine  $\text{SnO}_2$  and  $\text{SnO}_2/\text{CeO}_x$  films deposited on the glass/ITO substrate.



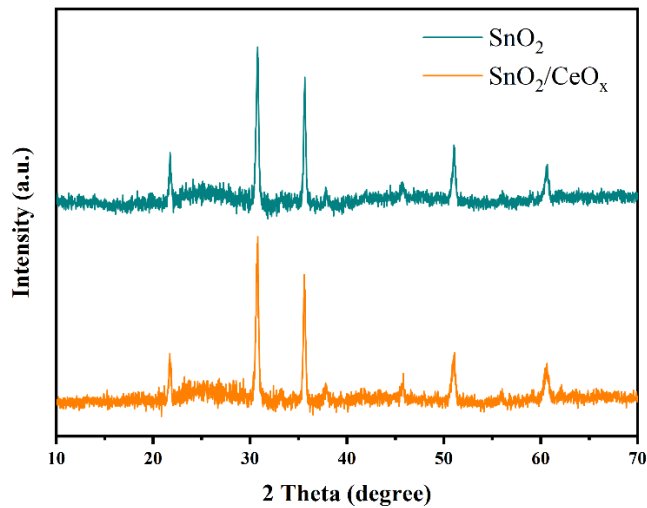

**Figure S5.** XRD patterns of SnO<sub>2</sub> and SnO<sub>2</sub>/ CeO<sub>x</sub> films.

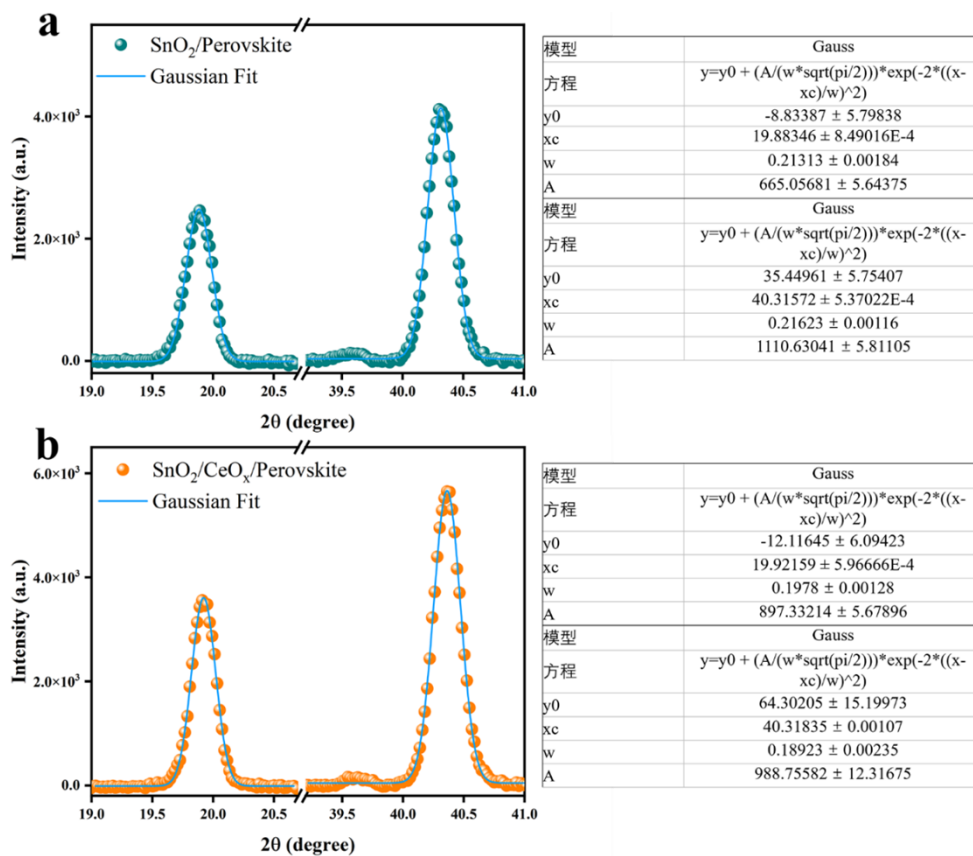

**Figure S6.** (a) The Gaussian fitting results of the perovskite film based on SnO<sub>2</sub>; (b) The Gaussian fitting results of the perovskite film based on SnO<sub>2</sub>/CeO<sub>x</sub>.

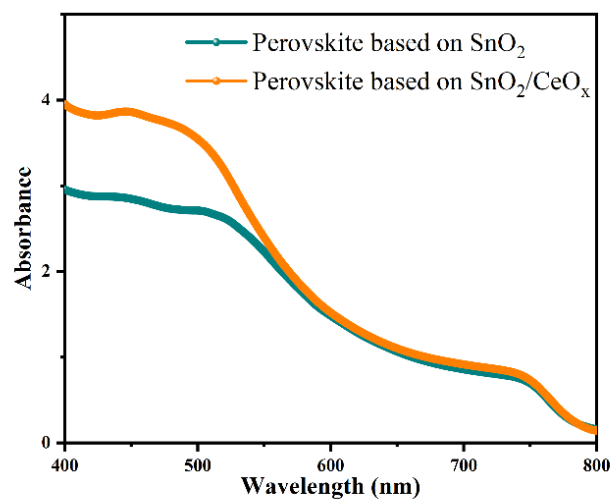

**Figure S7.** UV–Vis absorbance spectra for perovskite layers deposited on the SnO<sub>2</sub> and SnO<sub>2</sub>/CeO<sub>x</sub> films.

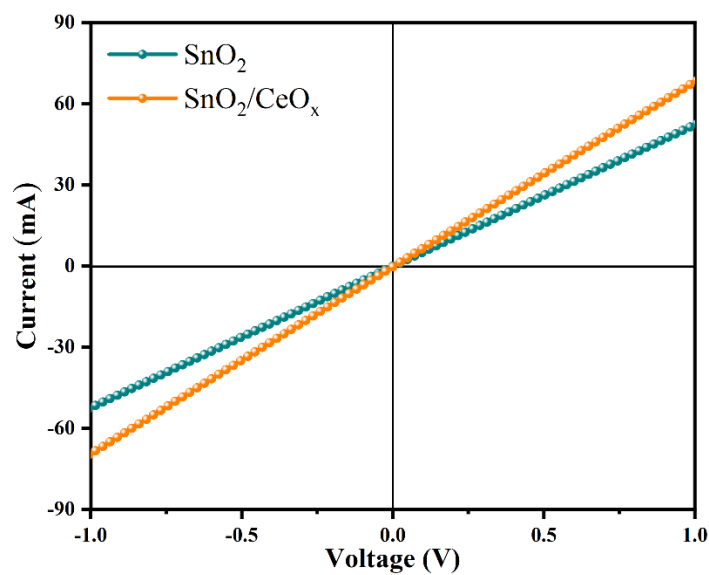

**Figure S8.** Dark *J-V* curves of the ITO/ETL/Ag structure.

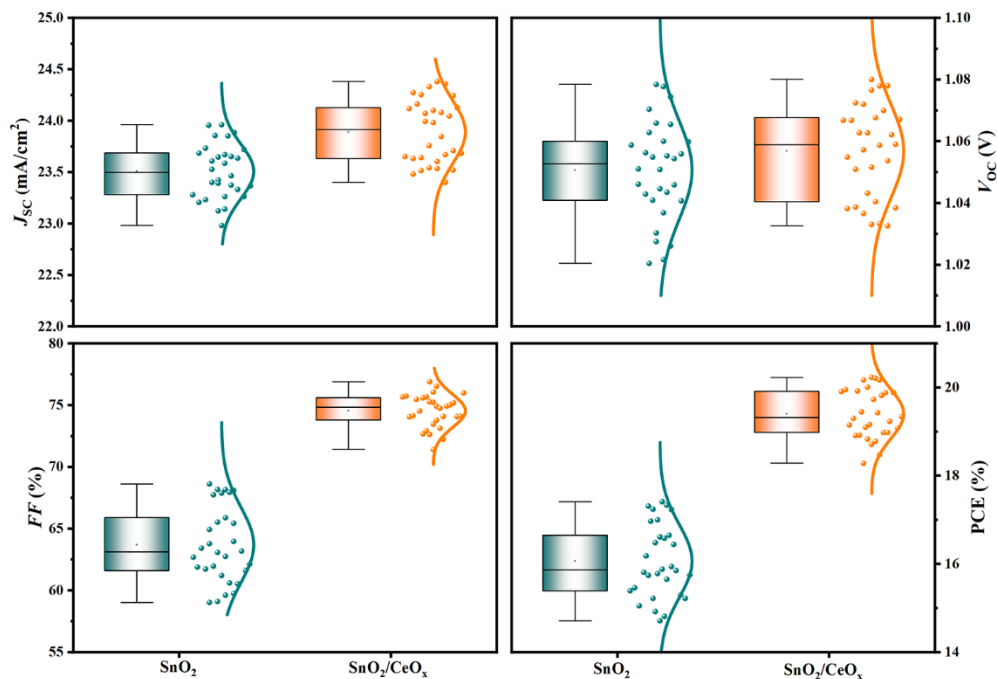

**Figure S9.** Box plots of the  $J_{\text{SC}}$ ,  $V_{\text{OC}}$ ,  $\text{FF}$ , and  $\text{PCE}$  of PSC devices based on the  $\text{SnO}_2$  and  $\text{SnO}_2/\text{CeO}_x$  ETLs.

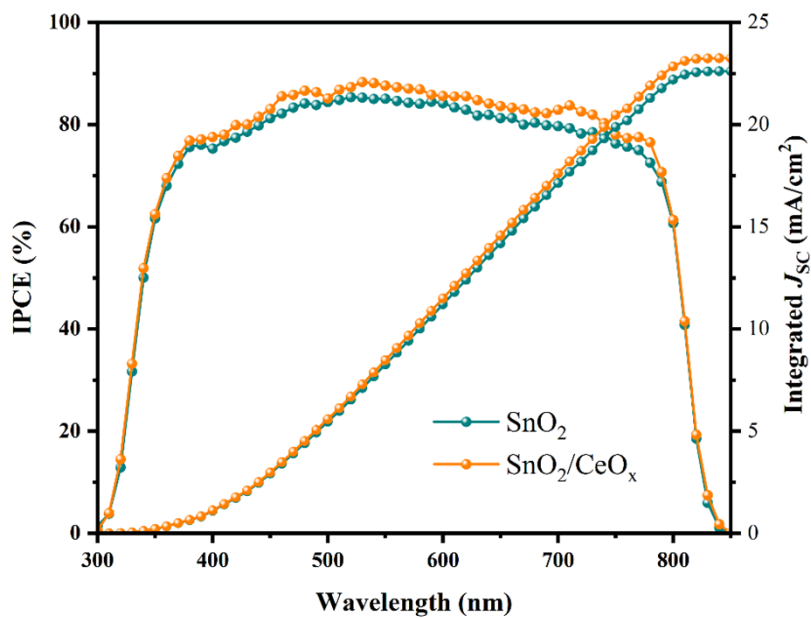

**Figure S10.** IPCE spectra and integrated  $J_{\text{SC}}$  values of the devices with  $\text{CeO}_x$  interlayer and the pristine one.

1

2 **Table S1.** The summarization of Ce 3d XPS data of CeO<sub>x</sub>.

| Ce 3d |       |       |       |                |       |       |       |       |                |
|-------|-------|-------|-------|----------------|-------|-------|-------|-------|----------------|
| u'''  | u''   | u'    | u     | u <sub>0</sub> | v'''  | v''   | v'    | v     | v <sub>0</sub> |
| 916.  | 907.  | 903.  | 900.  | 898.           | 898.  | 888.  | 885.  | 882.  | 880.           |
| 52 eV | 35 eV | 94 eV | 93 eV | 93 eV          | 21 eV | 27 eV | 38 eV | 08 eV | 12 eV          |

3

4 **Table S2.** The stoichiometric ratio of O/Ce from EDS mapping data corresponding to  
5 Figure 2d.

| Elements          | O K   | Si K | Ce L  | Total amount |
|-------------------|-------|------|-------|--------------|
| Weight percentage | 18.19 | 0.04 | 81.77 | 100.00       |
| Atomic percentage | 65.87 | 0.33 | 33.80 |              |

6 \*All analyzed elements have been normalized.

7

8 **Table S3.** The calculation results of the XRD FWHM of the perovskite layer on SnO<sub>2</sub>  
9 with and without CeO<sub>x</sub>, corresponding to Figure 3f and S6.

| Sample                                     | 2θ     | y <sub>0</sub> | x <sub>c</sub> | A          | w<br>(angle) |
|--------------------------------------------|--------|----------------|----------------|------------|--------------|
| SnO <sub>2</sub> /perovskite               | 19.88° | -8.83387       | 19.88346       | 665.05681  | 0.21313      |
|                                            | 40.32° | 35.44961       | 40.31572       | 1110.63041 | 0.21623      |
| SnO <sub>2</sub> /CeO <sub>x</sub> /perovs | 19.92° | -12.11645      | 19.92159       | 897.33214  | 0.19780      |
| kite                                       | 40.32° | 64.30205       | 40.31835       | 988.75582  | 0.18923      |

10

**Table S4.** Calculated UPS parameters for SnO<sub>2</sub> and CeO<sub>x</sub> films.

| ETLs             | $E_{\text{cut-off}}$<br>(eV) | $E_{\text{onset}}$<br>(eV) | $E_F$<br>(eV) | $VBM$<br>(eV) | $E_g$ (eV) | $CBM$<br>(eV) |
|------------------|------------------------------|----------------------------|---------------|---------------|------------|---------------|
| SnO <sub>2</sub> | 16.55                        | 3.70                       | 4.67          | 8.37          | 4.02       | 4.35          |
| CeO <sub>x</sub> | 17.02                        | 3.40                       | 4.20          | 7.60          | 3.50       | 4.10          |

**Table S5.** Fitting parameters of the TRPL curves.

| Sample                             | $A_1$   | $\tau_1$ (ns) | $A_2$   | $\tau_2$ (ns) | $\tau_{\text{ave}}$ (ns) |
|------------------------------------|---------|---------------|---------|---------------|--------------------------|
| SnO <sub>2</sub>                   | 0.17571 | 46.76         | 0.74740 | 123.15        | 116.89                   |
| SnO <sub>2</sub> /CeO <sub>x</sub> | 0.77539 | 2.66          | 0.75845 | 57.41         | 54.93                    |

**Table S6.** Fitting parameters ( $R_s$  and  $R_{\text{rec}}$ ) of PSCs based on different ETLs derived from

Figure 5c.

| Sample                             | $R_s$ ( $\Omega$ ) | $R_{\text{rec}}$ ( $\Omega$ ) |
|------------------------------------|--------------------|-------------------------------|
| SnO <sub>2</sub>                   | 28.5               | 21305.2                       |
| SnO <sub>2</sub> /CeO <sub>x</sub> | 21.4               | 22954.4                       |

**Table S7.** The full photovoltaic parameters for fabricated PSCs corresponding to Figure

6a.

| Device                             | $J_{\text{SC}}$ (mA cm <sup>-2</sup> ) | $V_{\text{OC}}$ (V) | $FF$ (%)     | $PCE$ (%)    |
|------------------------------------|----------------------------------------|---------------------|--------------|--------------|
| SnO <sub>2</sub>                   | 23.47 ± 0.49                           | 1.05 ± 0.03         | 63.82 ± 4.80 | 16.06 ± 1.35 |
| SnO <sub>2</sub> /CeO <sub>x</sub> | 23.89 ± 0.49                           | 1.06 ± 0.03         | 74.16 ± 2.76 | 19.26 ± 0.98 |

1

2 **Table S8.** Mean values and standard deviation ( $\delta$ ) for 30 devices with SnO<sub>2</sub> ETL and3 SnO<sub>2</sub>/CeO<sub>x</sub> ETL.

| Device                             |          | $J_{SC}$ (mA cm <sup>-2</sup> ) | $V_{OC}$ (V) | $FF$ (%)   | $PCE$ (%)  |
|------------------------------------|----------|---------------------------------|--------------|------------|------------|
| SnO <sub>2</sub>                   | Average  | 23.51                           | 1.05         | 63.68      | 16.06      |
|                                    | $\delta$ | $\pm 0.26$                      | $\pm 0.016$  | $\pm 3.04$ | $\pm 0.83$ |
| SnO <sub>2</sub> /CeO <sub>x</sub> | Average  | 23.89                           | 1.06         | 74.54      | 19.40      |
|                                    | $\delta$ | $\pm 0.31$                      | $\pm 0.015$  | $\pm 1.33$ | $\pm 0.56$ |

4

5

6 **Table S9.** Photovoltaic parameters of the control devices and the best devices under7 reverse (1.2 V  $\rightarrow$  -0.1 V) and forward (-0.1 V  $\rightarrow$  1.2 V) scans.

| Device                             |         | $J_{SC}$ (mA cm <sup>-2</sup> ) | $V_{OC}$ (V) | $FF$ (%) | $PCE$ (%) | $HI$ (%) |
|------------------------------------|---------|---------------------------------|--------------|----------|-----------|----------|
| SnO <sub>2</sub>                   | Reverse | 23.95                           | 1.06         | 68.6     | 17.41     | 13.09    |
|                                    | Forward | 23.78                           | 1.04         | 61.2     | 15.13     |          |
| SnO <sub>2</sub> /CeO <sub>x</sub> | Reverse | 24.35                           | 1.08         | 76.9     | 20.23     | 3.01     |
|                                    | Forward | 24.28                           | 1.08         | 74.8     | 19.62     |          |

8
